# Supplementary material
Source: publisher site journal article supplement (https://www.spandidos-publications.com/1150/downloadSupplementary)

Figure S1. Serum ALAT and ASAT expression levels in IRI model rats following treatment with PHC, 3-MA or Rapa. Serum (A) ALAT and (B) ASAT expression levels were detected using ELISA following reperfusion for 6 h.  $\star\star P < 0.01$  vs. sham group;  $\star\star P < 0.01$  vs. I/R group;  $\#\# P < 0.01$  vs. I/R + PHC group. 3-MA, 3-methyladenine; ALAT, alanine aminotransferase; ASAT, serum aspartate aminotransferase; I/R, ischemia/reperfusion; PHC, penicillamine hydrochloride; Rapa, rapamycin.

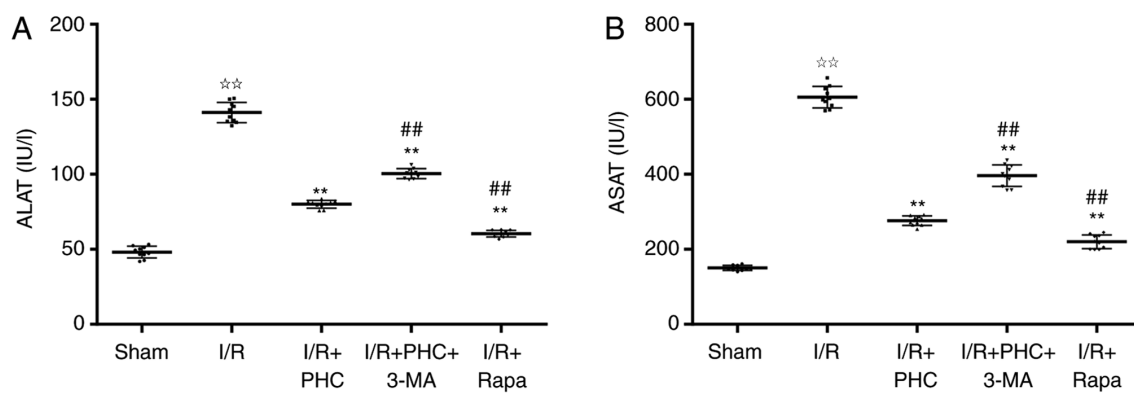

Supplement: Supplementary file 1 [file downloadSupplementary]
